# Supplementary material for: A dual aperture (mesoporous and macroporous) system loaded with cell-free fat extract to optimize bone regeneration microenvironment
Source: Royal Society of Chemistry journal article supplement (doi:10.1039/d2tb01980a), 2022-12-14
Supplement: d2tb01980a1.pdf [file d2tb01980a1.pdf]

## Supporting Information

A dual aperture (mesoporous and macroporous) system loaded with cell-free fat extract to optimize bone regeneration microenvironment

Enhui Qiu<sup>a, 1</sup>, Yan Gong<sup>b, 1</sup>, Jieran Yao<sup>a</sup>, Jinqing Lai<sup>a</sup>, Zhihua Liu<sup>a</sup>, Da-Peng Yang<sup>c</sup>, Li Shen<sup>b, \*</sup>, and Xiangrong Chen<sup>a, \*</sup>

<sup>a</sup>The Second Affiliated Hospital of Fujian Medical University, Fujian 362000, China.

<sup>b</sup>Department of Thoracic Surgery, Shanghai Key Laboratory of Tissue Engineering, Shanghai Ninth People's Hospital, Shanghai Jiao Tong University School of Medicine, Shanghai 200011, China.

<sup>c</sup>Chemical Engineering and Materials Science, Quanzhou Normal University, Quanzhou 362000, Fujian Province, PR China

<sup>1</sup>E.H. Qiu and Y. Gong made equal contribution in this study.

\*Corresponding Author

E-mails: xiangrong\_chen281@126.com (X. Chen);  
shenli@shchildren.com.cn (L. Shen).

## 1. Supplemental Table

**Table S1.** Primers used for real-time RT-PCR.

| Genes          | Sequence (5'-3')                       |                                        |
|----------------|----------------------------------------|----------------------------------------|
| TNF- $\alpha$  | 5' CCT CCC TCT CAT CAG TTC TA 3'       | 5' ACT TGG TGG TTT GCT ACG AC 3'       |
| IL-1 $\beta$   | 5' CAG CTT TCG ACA GTG AGG<br>AGA 3'   | 5' TTG TCG AGA TGC TGC TGT GA 3'       |
| <i>ocn</i>     | 5' CTC ACA CTC CTC GCC CTA TT<br>3'    | 5' CCC AGC CAT TGA TAC AGG TAG<br>3'   |
| <i>osx</i>     | 5' CAG TTG ATA GGG TTT CTC TTG<br>TA3' | 5' CAT AGG ACT TGA GGT TTC ACA<br>G 3  |
| <i>opn</i>     | 5' CAT TCC GAT GTG ATT GAT AGT<br>C 3  | 5' CTT CCT TAC TTT TGG GGT CTA C<br>3  |
| <i>alp</i>     | 5' TAC AAG CAC TCC CAC TTC ATC<br>3'   | 5' AGA CCC AAT AGG TAG TCC ACA<br>T 3' |
| <i>vegf</i>    | 5' TGT GCC CAC TGA GGA GTC 3'          | 5' CAT TTG TTG TGC TGT AGG AAG 3       |
| <i>pdgh-bb</i> | 5' GCT GTT GAG GTG GCT GTA<br>GAT 3    | 5' GCT GTT GAG GTG GCT GTA GAT 3       |
| <i>gapdh</i>   | 5' GCT GTT GAG GTG GCT GTA<br>GAT 3    | 5' GCT GTT GAG GTG GCT GTA GAT 3       |

## 2. Supplemental Figures

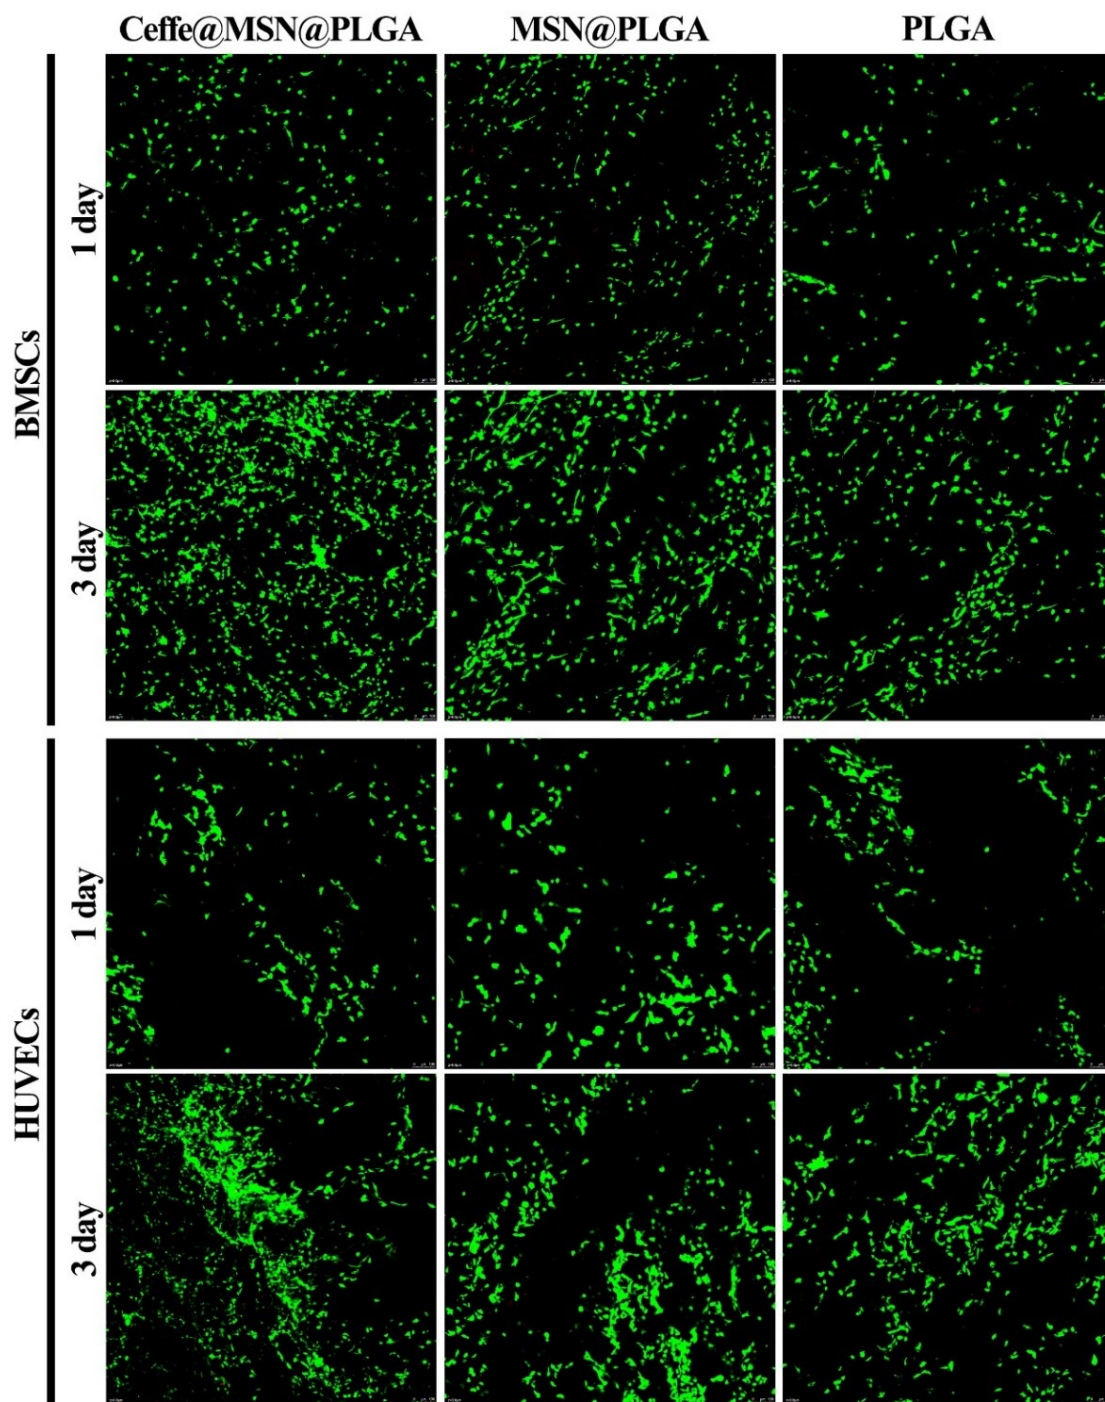

**Figure S1.** Confocal images of Living/Dead cell staining of HUVECs and BMSCs after cocultured with different scaffold for 1day and 3 day.

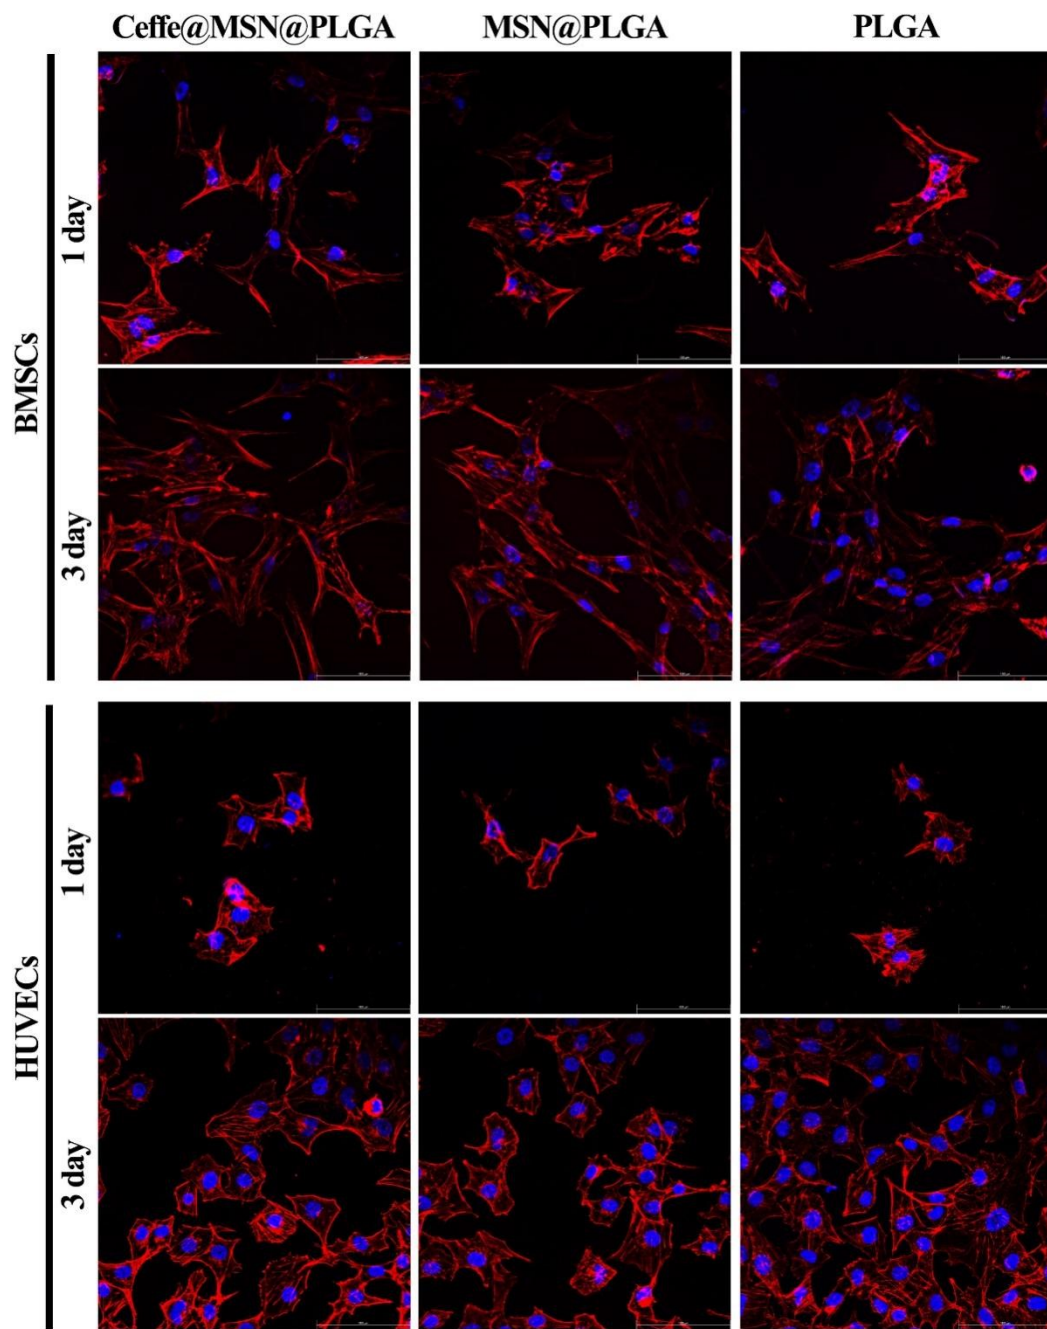

**Figure S2.** The images of cytoskeleton staining of HUVECs and BMSCs co-cultured with different scaffolds for 1 day and 3 day were taken by laser confocal microscopy.

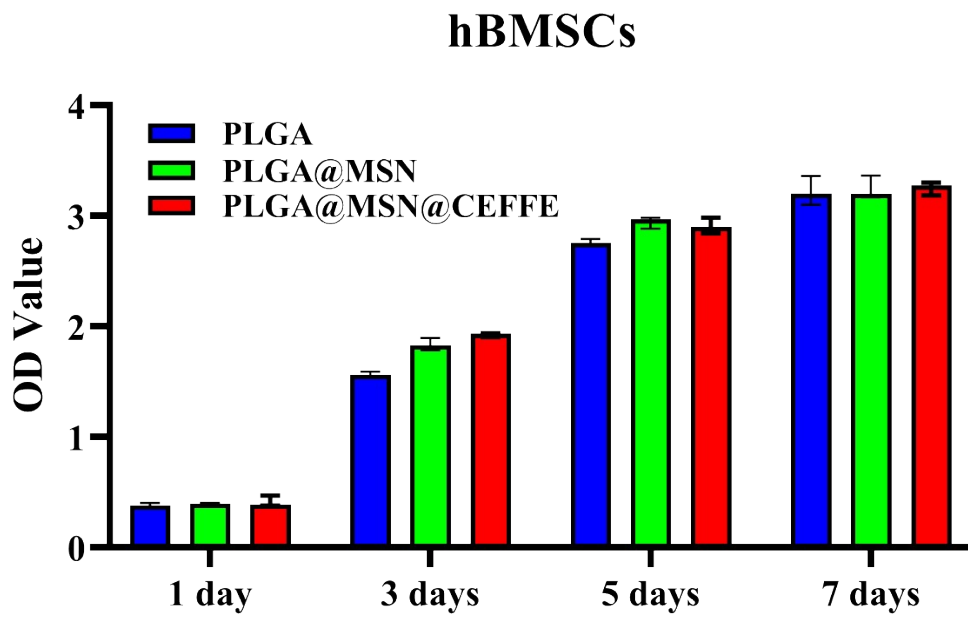

**Figure S3.** The Cck-8 assay kit was used to evaluate the cell proliferation of hBMSCs co-cultured with different scaffolds for 1, 3, 5, and 7 days, respectively.

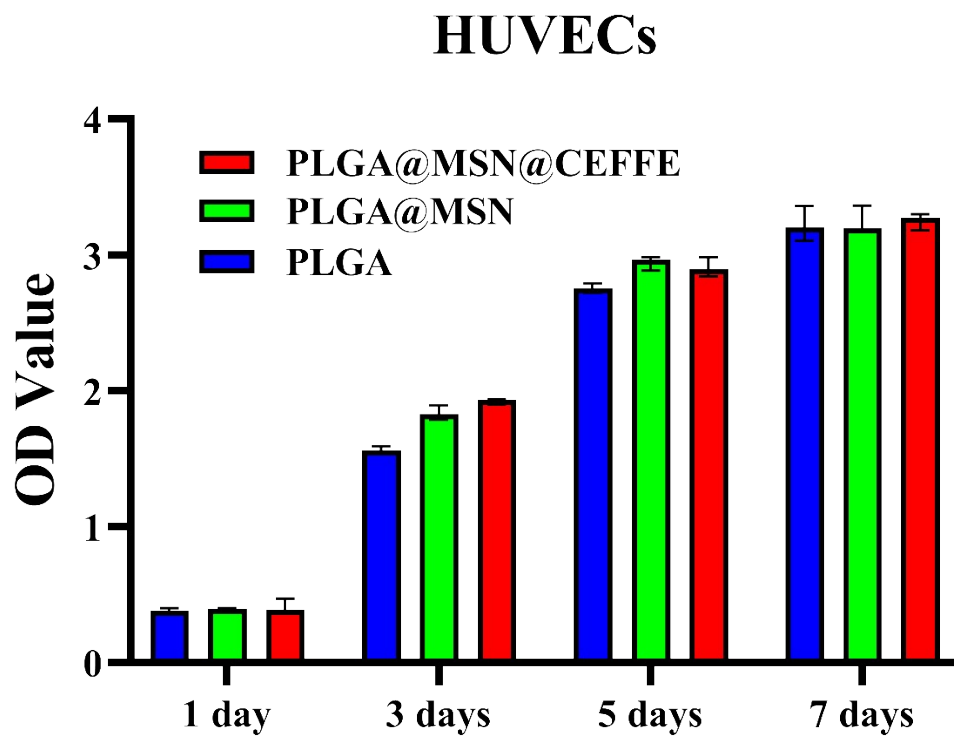

**Figure S4.** The Cck-8 assay kit was used to evaluate the cell proliferation of HUVECs co-cultured with different scaffolds for 1, 3, 5, and 7 days, respectively.
